# Supplementary material
Source: PubMed Central journal article supplement (PMC3058770)
Supplement: supp_msq293_mbe-10-0694-File010.pdf [file supp_msq293_mbe-10-0694-File010.pdf]

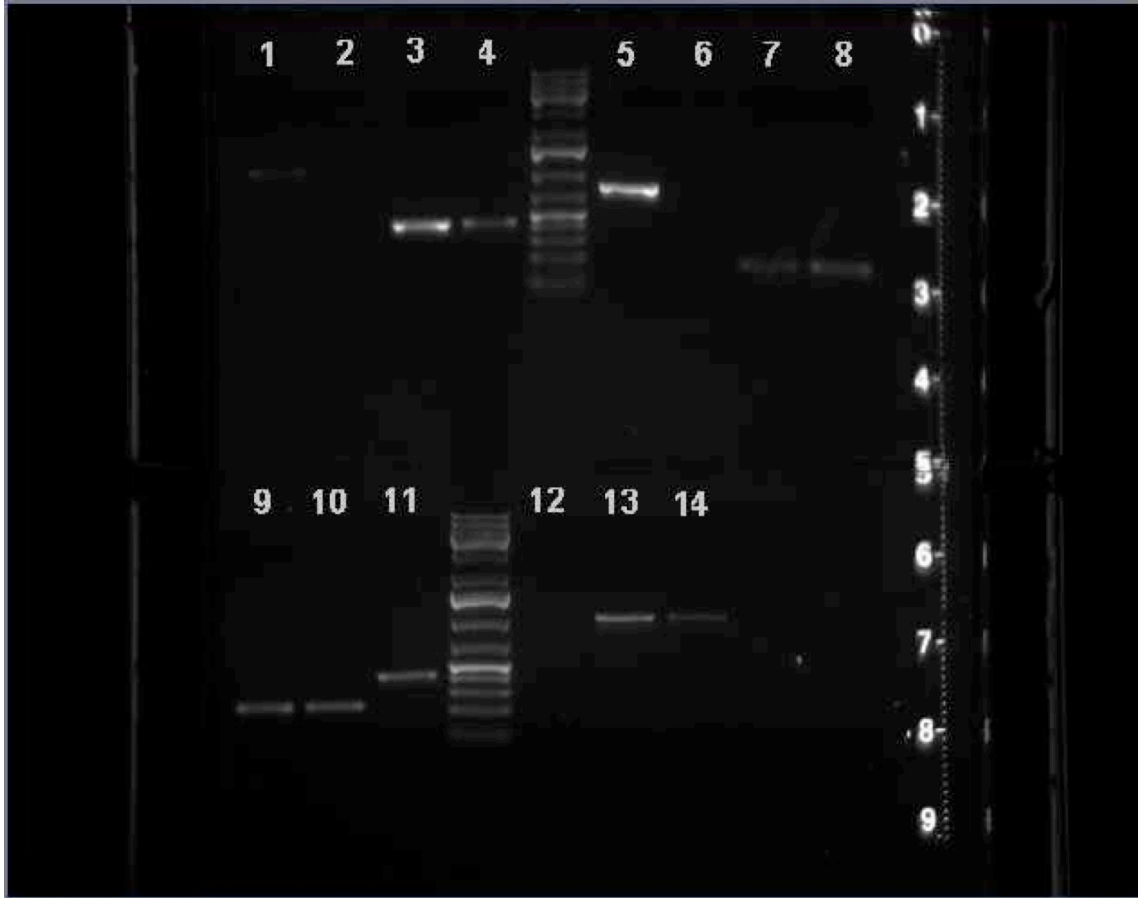

**Figure 1S.** RT-PCR results. 1. GA27083\_2731 gDNA (Neighbor gene\_ncRNA candidate ID, genomic DNA amplification); 2. GA27083\_2731 cDNA (Neighbor gene\_ncRNA candidate ID, RT-PCR); 3. GA14511\_353 gDNA; 4. GA14511\_353 cDNA; 5. GA13184\_GA26180 gDNA; 6. GA13184\_GA26180 cDNA; 7. 2407\_GA10085 gDNA; 8. 2407\_GA10085 cDNA; 9. 2897\_GA26180 gDNA; 10. 2897\_GA26180 cDNA; 11. GA13184\_2897 gDNA; 12. GA13184\_2897 cDNA; 13. GA23998\_4305 gDNA; 14. GA23998\_4305 cDNA.
